# Supplementary material for: Association of sarcopenia with ideal cardiovascular health metrics among US adults: a cross-sectional study of NHANES data from 2011 to 2018
Source: HighWire-hosted journal article supplement (doi:10.1136/bmjopen-2022-061789), 2022-09-01
Supplement: bmjopen-2022-061789supp002_data_supplement.pdf [file bmjopen-2022-061789supp002_data_supplement.pdf]

**Table S1 Baseline characteristics of the study population by sarcopenic.**

| <b>Characteristics</b>             | <b>Non-sarcopenic<br/>(n=8519)</b> | <b>Sarcopenic<br/>(n=807)</b> | <b>p-value</b> |
|------------------------------------|------------------------------------|-------------------------------|----------------|
| <b>Age, mean (SE), years</b>       | 39.0 (0.3)                         | 42.9 (0.6)                    | 0.002          |
| <b>Female, n (%)</b>               | 4330 (50.3)                        | 403 (45.9)                    | 0.060          |
| <b>Race/ethnicity, n (%)</b>       |                                    |                               |                |
| Mexican American                   | 1124 (9.9)                         | 282 (26.1)                    | < 0.001        |
| Other Hispanic                     | 846 (6.9)                          | 121 (12.0)                    |                |
| Non-Hispanic White                 | 3103 (61.3)                        | 220 (47.4)                    |                |
| Non-Hispanic Black                 | 1905 (11.9)                        | 50 (3.4)                      |                |
| Other                              | 1541 (9.9)                         | 134 (11.1)                    |                |
| <b>Heavy use of alcohol, n (%)</b> |                                    |                               |                |
| <12                                | 6174 (97.9)                        | 426 (95.8)                    | 0.026          |
| ≥12                                | 135 (2.1)                          | 21 (4.2)                      |                |
| <b>Education level, n (%)</b>      |                                    |                               |                |
| Less Than High School              | 3214 (33.2)                        | 461 (52.0)                    | < 0.001        |
| High School Diploma                | 2878 (34.1)                        | 214 (32.2)                    |                |
| More Than High School              | 2425 (32.7)                        | 132 (15.8)                    |                |
| <b>Smoking risk, n (%)</b>         |                                    |                               |                |
| Ideal                              | 1969 (22.2)                        | 138 (18.8)                    | 0.085          |
| Intermediate                       | 202 (2.9)                          | 14 (1.8)                      |                |
| Poor                               | 6348 (74.8)                        | 655 (79.4)                    |                |
| <b>Body mass index risk, n (%)</b> |                                    |                               |                |
| Ideal                              | 2826 (33.1)                        | 64 (6.5)                      | < 0.001        |
| Intermediate                       | 2746 (33.5)                        | 191 (21.1)                    |                |
| Poor                               | 2947 (33.4)                        | 525 (72.4)                    |                |

|                                                   |             |            |         |
|---------------------------------------------------|-------------|------------|---------|
| <b>Physical activity risk, n (%)</b>              |             |            |         |
| Ideal                                             | 3371 (42.1) | 289 (39.1) |         |
| Intermediate                                      | 579 (7.7)   | 46 (6.5)   | 0.274   |
| Poor                                              | 4569 (50.2) | 472 (54.4) |         |
| <b>Healthy diet score risk, n (%)</b>             |             |            |         |
| Ideal                                             | 188 (2.3)   | 13 (1.0)   |         |
| Intermediate                                      | 3716 (44.7) | 330 (38.8) | 0.001   |
| Poor                                              | 4615 (52.9) | 464 (60.0) |         |
| <b>Total cholesterol risk, n (%)</b>              |             |            |         |
| Ideal                                             | 4853 (54.8) | 360 (45.7) |         |
| Intermediate                                      | 2292 (28.4) | 256 (32.1) | 0.002   |
| Poor                                              | 1374 (16.8) | 191 (22.2) |         |
| <b>Blood pressure risk, n (%)</b>                 |             |            |         |
| Ideal                                             | 4203 (46.6) | 271 (25.7) |         |
| Intermediate                                      | 2650 (33.3) | 283 (37.6) | < 0.001 |
| Poor                                              | 1666 (20.1) | 253 (36.8) |         |
| <b>Fasting plasma glucose risk, n (%)</b>         |             |            |         |
| Ideal                                             | 6103 (50.4) | 406 (32.3) |         |
| Intermediate                                      | 1711 (31.8) | 234 (33.9) | < 0.001 |
| Poor                                              | 705 (17.8)  | 167 (33.8) |         |
| <b>Scores of seven healthy metrics, mean (SE)</b> |             |            |         |
|                                                   | 8.4 (0.0)   | 6.8 (0.1)  | < 0.001 |
| <b>Overall CVH metrics, n (%)</b>                 |             |            |         |
| Poor                                              | 3193 (34.3) | 479 (59.3) |         |
| Intermediate or Ideal                             | 5326 (65.7) | 328 (40.7) | < 0.001 |

**Abbreviations:** CVH, cardiovascular health.

Poor CVH: CVH metrics scores 0-7; Intermediate or Ideal CVH: CVH metrics scores 8-14.
